# Supplementary material for: Acute and chronic effects of cannabinoids on effort-related decision-making and reward learning: an evaluation of the cannabis ‘amotivational’ hypotheses
Source: Psychopharmacology (Berl). 2016 Sep 2;233(19):3537–52. doi: 10.1007/s00213-016-4383-x (PMC5021728; doi:10.1007/s00213-016-4383-x)
Supplement: Supplementary file 1 — (DOCX 35.3 kb) [file 213_2016_4383_MOESM1_ESM.docx]

**Psychopharmacology**

**Electronic Supplementary Material 1**

Acute and chronic effects of cannabinoids on effort-related decision-making and reward learning: an evaluation of the cannabis ‘amotivational’ hypotheses.

Will Lawn1, Tom P Freeman1, Rebecca A Pope1, Alyssa Joye1, Lisa Harvey1, Chandni Hindocha1, Claire Mokrysz1, Abigail Moss1, Matthew B Wall1,2,3, Michael AP Bloomfield1,4,5, Ravi K Das1, Celia JA Morgan1,6, David J Nutt7, H Valerie Curran1

1Clinical Psychopharmacology Unit, University College London, Gower Street, London, UK.

**2**Imanova Ltd, Burlington Danes Building, Imperial College London, Hammersmith Hospital, Du Cane Road, London, UK.

3Division of Brain Sciences, Imperial College London, London, UK.

**4**Psychiatric Imaging Group, Medical Research Council Clinical Sciences Centre, Hammersmith Hospital, London, UK.

5Division of Psychiatry, University College London, Maple House, London, UK.

6Centre for Clinical Psychopharmacology, University of Exeter, Exeter, UK.

7Neuropsychopharmacology Unit, Division of Experimental Medicine, Imperial College London, Burlington Danes Building, Du Cane Road, London, UK.

**Results study 1**

*Time to complete an easy trial and a hard trial*

An ANOVA with within-subjects factors of drug (placebo, Cann-CBD and Cann+CBD) and choice (low-effort, high-effort) was conducted. There was no effect of drug or interaction between drug and choice. Hence, the drug type did not significantly affect time to complete a trial, and thus button-pressing speed during the task.

*Completion of trials*

Out of a total of 21 trials, on placebo an average of 20.15 (SD=1.51) trials were completed, on Cann+CBD an average of 19.47 (SD=2.33) trials were completed, and on Cann-CBD an average of 19.80 (SD=1.86) trials were completed. There was no significant effect of drug on the number of trials completed.

**Results study 2**

*Time to complete an easy trial and a hard trial*

An ANOVA with a between-subjects factor of group (drug-using control and cannabis dependent) and a within-subjects factor of choice (low-effort and high-effort) was conducted. There was no significant effect of group or interaction between group and choice. Hence, there was no difference between drug-using controls and cannabis dependent participants on time to complete a trial, and thus button-pressing speed during the task.

*Completion of trials*

Out of 21 trials, the drug-using controls completed an average of 20.90 (SD=0.30) trials and the cannabis dependent participants completed an average of 20.21 (SD=0.39) trials. There was no significant effect of group or an interaction between group and choice on the number of trials completed.

**Tables**

*Table 1 Means (S.D.) and frequencies for demographic data and drug use for participants in study 1. Data was missing for one participant for BDI, TEPS and drugs history.*

|  | Participants |
| --- | --- |
| Age | 26.18 (7.13) |
| Gender (m/f) | 8/9 |
| BDI | 3.38 (3.12) |
| TEPS consummatory | 43.50 (5.61) |
| TEPS anticipatory | 42.06 (4.85) |
| TEPS total | 86.56 (9.30) |
| Cannabis SDS | 1.13 (1.26) |
| Alcohol ever used (y/n) | 16/0 |
| Alcohol use now (y/n) | 16/0 |
| Alcohol days per month | 10.81 (4.86) |
| Alcohol units/session | 5.93 (2.08) |
| Amphetamine ever used (y/n) | 8/8 |
| Amphetamine use now (y/n) | 0/16 |
| Amphetamine days per month | NA |
| Amphetamine grams/session | NA |
| Cannabis ever used (y/n) | 16/0 |
| Cannabis use now (y/n) | 16/0 |
| Cannabis days per month | 8.06 (5.48) |
| Cannabis days to smoke an 8th | 25.88 (33.73) |
| Cocaine ever used (y/n) | 11/5 |
| Cocaine use now (y/n) | 3/13 |
| Cocaine days per month | 1.0 (0.0) |
| Cocaine grams/session | 0.5 (0.0) |
| Heroin ever used (y/n) | 0/16 |
| Heroin use now (y/n) | 0/16 |
| Heroin days per month | NA |
| Heroin grams/session | NA |
| Ketamine ever used (y/n) | 10/6 |
| Ketamine use now (y/n) | 2/14 |
| Ketamine days per month | 1.50 (0.71) |
| Ketamine grams/session | 0.75 (0.35) |
| Mephedrone ever used (y/n) | 7/9 |
| Mephedrone use now (y/n) | 0/16 |
| Mephedrone days per month | NA |
| Mephedrone grams/session | NA |
| MDMA ever used (y/n) | 14/2 |
| MDMA use now (y/n) | 6/10 |
| MDMA days per month | 1.50 (0.84) |
| MDMA grams/session | 0.31 (0.19) |
| Tobacco ever used (y/n) | 15/1 |
| Tobacco use now (y/n) | 15/1 |
| Tobacco days per month | 11.30 (10.27) |
| Tobacco cigs/day (when smoking) | 3.63 (3.62) |
| Tobacco average cigs/day | 2.16 (3.48) |

*Table 2 GEE Models for EEfRT from study 1. The likelihood of making a high-effort choice was predicted from each of the predictors shown in the tables below. The models were calculated at different levels of probability separately: model 1: low probability (12%), model 2: medium probability (50%), model 3: high probability (88%). This was to investigate the drug X expected value interaction which was found to be significant. Beta coefficients for each predictor term, standard errors, p-values, odds ratios (OR) and 95% confidence intervals (CI) for these ORs are shown. The most important terms are in bold.*

Model 1

|  | Beta | S.E. | p | Odds Ratio | 95% CI OR |
| --- | --- | --- | --- | --- | --- |
| Magnitude | 0.058 | 0.0310 | 0.062 | 1.059 | 0.997, 1.126 |
| Trial number | -0.011 | 0.0030 | <0.001 | 0.989 | 0.983, 0.995 |
| Gender | 1.142 | 0.427 | 0.007 | 3.133 | 1.357, 7.232 |
| Placebo vs. Cann-CBD | 0.032 | 0.103 | 0.752 | 1.033 | 0.845, 1.263 |
| Cann+CBD vs. Cann-CBD | -0.463 | 0.176 | 0.008 | 0.630 | 0.446, 0.889 |
| (Placebo vs. Cann-CBD) X magnitude | **0.110** | **0.064** | **0.086** | **1.117** | **0.985, 1.267** |
| (Cann+CBD vs. Cann-CBD) X magnitude | **0.412** | **0.156** | **0.008** | **1.510** | **1.113, 2.048** |

Model 2

|  | Beta | S.E. | p | Odds Ratio | 95% CI OR |
| --- | --- | --- | --- | --- | --- |
| Magnitude | 0.247 | 0.0603 | <0.001 | 1.280 | 1.137, 1.440 |
| Trial number | -0.013 | 0.0028 | <0.001 | 0.987 | 0.982, 0.993 |
| Gender | 0.462 | 0.250 | 0.064 | 0.064 | 0.973, 2.589 |
| Placebo vs. Cann-CBD | -0.120 | 0.206 | 0.560 | 0.887 | 0.592, 1.328 |
| Cann+CBD vs. Cann-CBD | 0.094 | 0.130 | 0.472 | 1.098 | 0.851, 1.418 |
| (Placebo vs. Cann-CBD) X magnitude | **0.089** | **0.143** | **0.533** | **1.093** | **0.826, 1.448** |
| (Cann+CBD vs. Cann-CBD) X magnitude | **-0.071** | **0.101** | **0.481** | **0.931** | **0.765, 1.135** |

Model 3

|  | Beta | S.E. | p | Odds Ratio | 95% CI OR |
| --- | --- | --- | --- | --- | --- |
| Magnitude | 0.416 | 0.0888 | <0.001 | 1.517 | 1.274, 1.805 |
| Trial number | -0.009 | 0.0042 | 0.024 | 0.991 | 0.982, 0.999 |
| Gender | 0.366 | 0.1262 | 0.004 | 1.443 | 1.126, 1.847 |
| Placebo vs. Cann-CBD | 0.261 | 0.195 | 0.181 | 1.298 | 0.885, 1.903 |
| Cann+CBD vs. Cann-CBD | 0.113 | 0.190 | 0.550 | 1.120 | 0.772, 1.624 |
| (Placebo vs. Cann-CBD) X magnitude | **-0.173** | **1.395** | **0.215** | **0.841** | **0.640, 1.106** |
| (Cann+CBD vs. Cann-CBD) X magnitude | **-0.098** | **0.125** | **0.432** | **0.907** | **0.710, 1.158** |

*Table 3 Demographic details and drug history for non-dependent, drug-using controls and cannabis-dependent participants in study 2. *p<0.05, **p<0.01, ***p<0.001*

|  | Control | Cannabis |
| --- | --- | --- |
| Age | 27.25 (6.80) | 27.75 (7.31) |
| Gender (f/m) | 6/14 | 7/13 |
| Highest education level (GCSE/NVQ-BTEC-Diploma/A-Levels/Undergraduate Degree/Postgraduate Degree) | 2/2/5/9/2 | 5/3/1/10/1 |
| BDI** | 5.32 (5.41) | 12.20 (9.00) |
| TEPS consummatory | 39.25 (6.21) | 35.80 (6.70) |
| TEPS anticipatory | 46.45 (6.69) | 46.10 (7.45) |
| TEPS total | 86.10 (11.76) | 81.90 (12.63) |
| Spot-the-word* | 48.30 (3.36) | 45.35 (3.84) |
| Cannabis SDS*** | 0 | 7.30 (3.39) |
| Alcohol ever used (y/n) | 20/0 | 20/0 |
| Alcohol use now (y/n) | 20/0 | 17/3 |
| Alcohol days per month | 14.11 (7.49) | 10.97 (8.64) |
| Alcohol units/session | 7.75 (4.61) | 7.72 (4.26) |
| Amphetamine ever used (y/n) | 9/11 | 9/11 |
| Amphetamine use now (y/n) | 0/20 | 1/19 |
| Amphetamine days per month | NA | 1 |
| Amphetamine grams/session | NA | 0.1 |
| Benzodiazepines ever used (y/n) | 9/11 | 10/10 |
| Benzodiazepines use now (y/n) | 1/19 | 3/17 |
| Benzodiazepines days per month | 2 | 2.83 (1.04) |
| Benzodiazepines tablets per session | 1 | 1.25 (1.06) |
| Cannabis ever used (y/n) | 20/0 | 20/0 |
| Cannabis use now (y/n)*** | 8/12 | 20/0 |
| Cannabis days per month*** | 3.94 (1.78) | 28.19 (4.74) |
| Cannabis grams/session*** | 0.31 (0.28) | 1.49 (1.41) |
| Cocaine ever used (y/n) | 16/4 | 14/6 |
| Cocaine use now (y/n) | 8/12 | 4/16 |
| Cocaine days per month | 1.88 (0.84) | 3.00 (1.41) |
| Cocaine grams/session | 0.59 (0.33) | 0.75 (0.29) |
| Hallucinogens use now (y/n) | 1/19 | 1/19 |
| Hallucinogens days per month | 1 | 1 |
| Heroin ever used (y/n) | 2/18 | 3/17 |
| Heroin use now | 0/20 | 0/20 |
| Heroin days per month | NA | NA |
| MDMA ever used (y/n) | 18/2 | 16/4 |
| MDMA use now (y/n) | 7/13 | 5/15 |
| MDMA days per month | 1.43 (0.787) | 1.40 (0.548) |
| MDMA grams/session | 0.34 (0.33) | 0.44 (0.13) |
| Mephedrone ever used (y/n) | 7/13 | 6/14 |
| Mephedrone use now (y/n) | 0/20 | 0/20 |
| Mephedrone days per month | NA | NA |
| Mephedrone grams/session | NA | NA |
| Tobacco ever used (y/n) | 18/2 | 0/20 |
| Tobacco use now (y/n)** | 9/11 | 19/1 |
| Tobacco days per month* | 18.39 (12.95) | 29.26 (3.21) |
| Tobacco cigs/day (when smoking)* | 1.14 (2.53) | 7.55 (5.19) |
| Tobacco average cigs/day* | 1.43 (2.54) | 7.01 (5.38) |

*Table 4 GEE Models for EEfRT from study 2. The likelihood of making a high-effort choice was predicted from each of the predictors shown in the tables below. Beta coefficients for each predictor term, their standard errors, associated p-values, odds ratios (OR) and 95% confidence intervals (CI) for these ORs are shown. Av-Cigs/Day = average number of cigarettes smoked per day. The most important terms are in bold.*

Model 1

|  | Beta | S.E. | p | Odds Ratio | 95% CI OR |
| --- | --- | --- | --- | --- | --- |
| Magnitude | 0.236 | 0.0845 | 0.005 | 1.266 | 1.073, 1.494 |
| Probability | 0.278 | 0.0814 | 0.001 | 1.320 | 1.126, 1.549 |
| Expected Value | 0.278 | 0.1132 | 0.014 | 1.321 | 1.058, 1.649 |
| Trial Number | -0.015 | 0.0028 | <0.001 | 0.985 | 0.980, 0.990 |
| Gender | 0.125 | 0.0909 | 0.169 | 1.133 | 0.948, 1.354 |
| BDI | -0.006 | 0.0048 | 0.232 | 0.994 | 0.985, 1.004 |
| Av-Cigs/Day | -0.007 | 0.0069 | 0.297 | 0.993 | 0.979, 1.006 |
| Baseline button-pressing time | 0.011 | 0.0215 | 0.617 | 1.011 | 0.969, 1.054 |
| Cannabis vs. Controls | **0.047** | **0.1369** | **0.731** | **1.048** | **0.802, 1.371** |

Model 2

|  | Beta | S.E. | p | Odds Ratio | 95% CI OR |
| --- | --- | --- | --- | --- | --- |
| Magnitude | 0.218 | 0.0829 | 0.008 | 1.255 | 1.057, 1.463 |
| Probability | 0.279 | 0.0816 | 0.001 | 1.322 | 1.127, 1.551 |
| Expected Value | 0.276 | 0.1134 | 0.015 | 1.318 | 1.055, 1.646 |
| Trial Number | -0.015 | 0.0027 | <0.001 | 0.985 | 0.980, 0.990 |
| Gender | 0.126 | 0.0910 | 0.167 | 1.134 | 0.949, 1.356 |
| BDI | -0.006 | 0.0048 | 0.232 | 0.994 | 0.985, 1.004 |
| Av-Cigs/Day | -0.007 | 0.0069 | 0.294 | 0.993 | 0.979, 1.006 |
| Baseline button-pressing time | 0.011 | 0.0215 | 0.615 | 1.011 | 0.969, 1.054 |
| Cannabis vs. Controls | -0.005 | 0.1819 | 0.980 | 0.995 | 0.697, 1.422 |
| Cannabis vs Controls*Magnitude | **0.038** | **0.1053** | **0.715** | **1.039** | **0.845, 1.277** |

Model 3

|  | Beta | S.E. | p | Odds Ratio | 95% CI OR |
| --- | --- | --- | --- | --- | --- |
| Magnitude | 0.237 | 0.0853 | 0.006 | 1.267 | 1.072, 1.497 |
| Probability | 0.251 | 0.0904 | 0.005 | 1.285 | 1.077, 1.535 |
| Expected Value | 0.280 | 0.1136 | 0.014 | 1.323 | 1.059, 1.653 |
| Trial Number | -0.015 | 0.0028 | <0.001 | 0.980 | 0.980, 0.990 |
| Gender | 0.126 | 0.0910 | 0.1267 | 1.134 | 0.949, 1.356 |
| BDI | -0.006 | 0.0048 | 0.237 | 0.994 | 0.985, 1.004 |
| Av-Cigs/Day | -0.007 | 0.0069 | 0.294 | 0.993 | 0.979, 1.006 |
| Baseline button-pressing time | 0.010 | 0.0215 | 0.635 | 1.010 | 0.969, 1.054 |
| Cannabis vs. Controls | 0.004 | 0.1652 | 0.979 | 1.004 | 0.727, 1.389 |
| Cannabis vs. Controls*Probability | **0.054** | **0.1059** | **0.607** | **1.056** | **0.858, 1.300** |

Model 4

|  | Beta | S.E. | p | Odds Ratio | 95% CI OR |
| --- | --- | --- | --- | --- | --- |
| Magnitude | 0.237 | 0.0852 | 0.005 | 1.268 | 1.073, 1.498 |
| Probability | 0.278 | 0.0817 | 0.001 | 1.321 | 1.125, 1.550 |
| Expected Value | 0.215 | 0.1629 | 0.188 | 1.239 | 0.901, 1.705 |
| Trial Number | -0.015 | 0.0028 | <0.001 | 0.985 | 0.979, 1.006 |
| Gender | 0.128 | 0.0910 | 0.161 | 1.136 | 0.951, 1.358 |
| BDI | -0.006 | 0.0048 | 0.235 | 0.994 | 0.985, 1.004 |
| Av-Cigs/Day | -0.007 | 0.0070 | 0.289 | 0.993 | 0.979, 1.006 |
| Baseline button-pressing time | 0.010 | 0.0215 | 0.635 | 1.010 | 0.969, 1.054 |
| Cannabis vs. Controls | -0.025 | 0.1727 | 0.885 | 0.975 | 0.695, 1.368 |
| Cannabis vs. Controls*EV | **0.133** | **0.1769** | **0.451** | **1.142** | **0.808, 1.616** |
